# Supplementary material for: Low-current field-assisted assembly of copper nanoparticles for current collectors
Source: Royal Society of Chemistry journal article supplement (doi:10.1039/c4fd00263f), 2015-01-01
Supplement: c4fd00263f1.pdf [file c4fd00263f1.pdf]

## Electronic supplementary information

### Low-current field-assisted assembly of copper nanoparticles for current collectors

Lehao Liu,<sup>ab</sup> Bong Gill Choi,<sup>b</sup> Siu On Tung,<sup>c</sup> Tao Hu,<sup>b</sup> Yajie Liu,<sup>b</sup> Tiehu Li,<sup>a</sup> Tingkai Zhao<sup>a</sup> and  
Nicholas A. Kotov<sup>\*bd</sup>

<sup>a</sup>School of Materials Science and Engineering, Northwestern Polytechnical University, Xi'an  
710072, Shaanxi, P. R. China

<sup>b</sup>Department of Chemical Engineering, University of Michigan, Ann Arbor, Michigan 48109,  
USA. E-mail: kotov@umich.edu

<sup>c</sup>Macromolecular Science and Engineering, University of Michigan, Ann Arbor, Michigan 48109,  
USA

<sup>d</sup>Biointerfaces Institute, University of Michigan, Ann Arbor, Michigan 48109, USA

This PDF file includes: Figures S1 to S7.

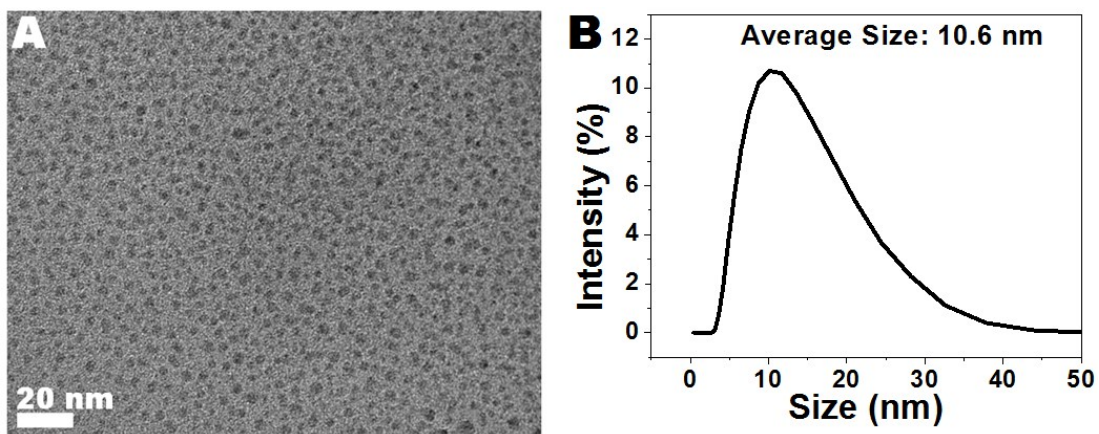

**Fig. S1.** (A) TEM image and (B) DLS size distribution of Cu NPs in dispersion. The larger size obtained in DLS data than in TEM images is attributed to the organic stabilizer shell and a relatively thick hydration layer.

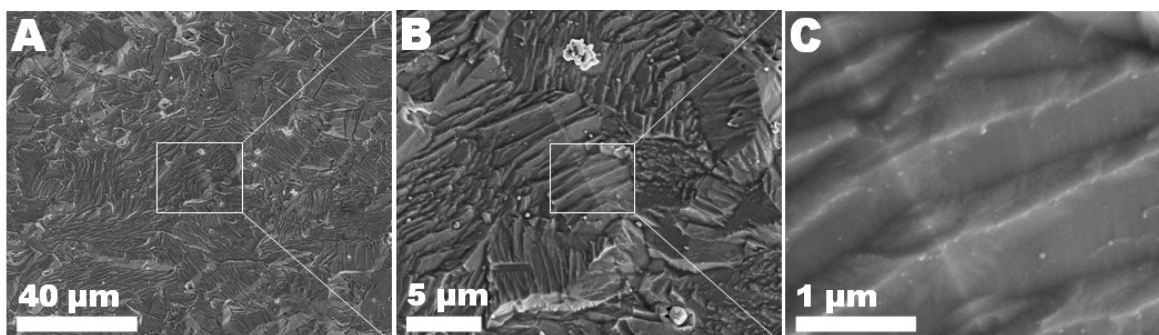

**Fig. S2.** (A-C) SEM images of Cu foil used for the preparation of NP-based film by field-stimulated assembly.

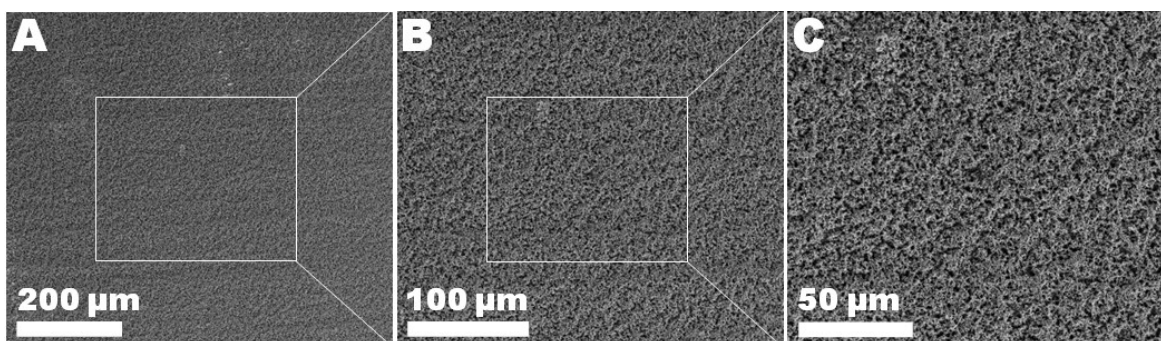

**Fig. S3.** (A-C) SEM images of 3D Cu film by field-stimulated assembly of Cu NPs at a potential of 2000 mV (current:  $\sim 75$  mA) for 8 min.

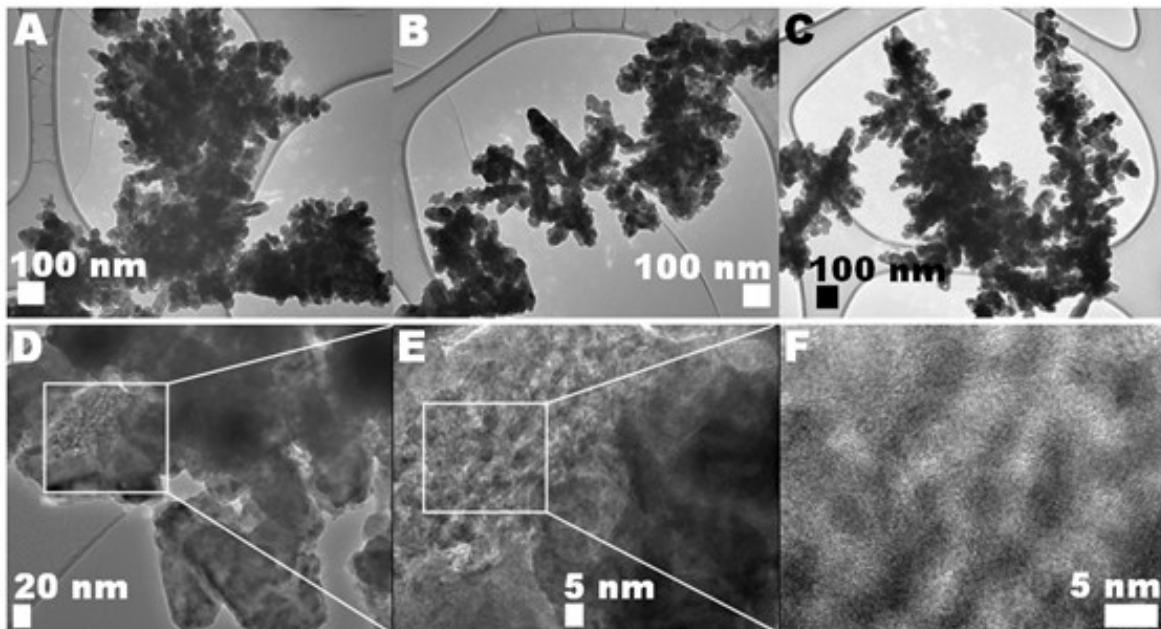

**Fig. S4.** (A-F) TEM images of the dendrites formed from Cu NPs during the field-stimulated assembly under a potential of 2000 mV (current:  $\sim 75$  mA) for 8 min.

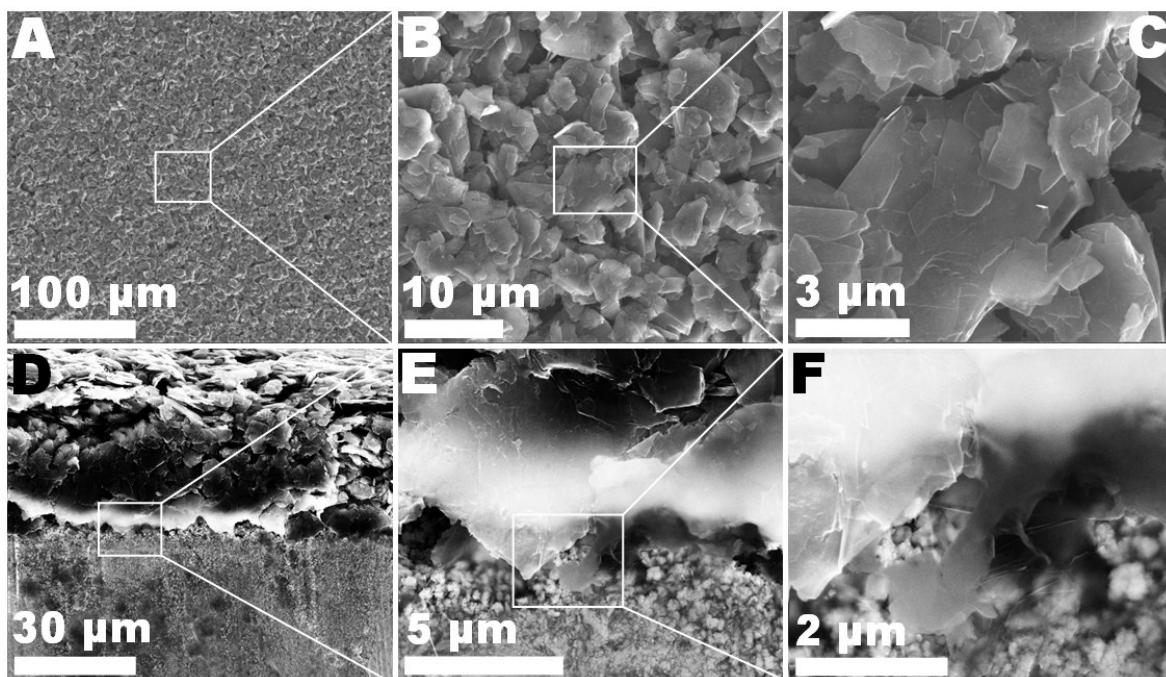

**Fig. S5.** (A-C) Top-view and (D-F) cross-sectional SEM images of dried graphite ( $\sim 3$  mg) slurry coating on NP-based Cu current collector prepared under a potential of 2000 mV (current:  $\sim 75$  mA) for 8 min.

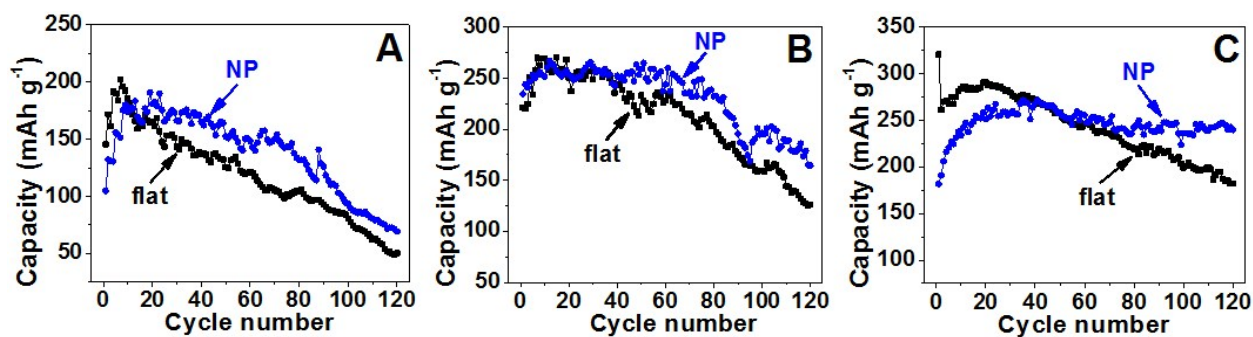

**Fig. S6.** Cycle performance of (A) 11.5, (B) 7.0 and (C) 3.0 mg graphite on flat and NP-based Cu electrodes at 0.25 C rate, respectively.

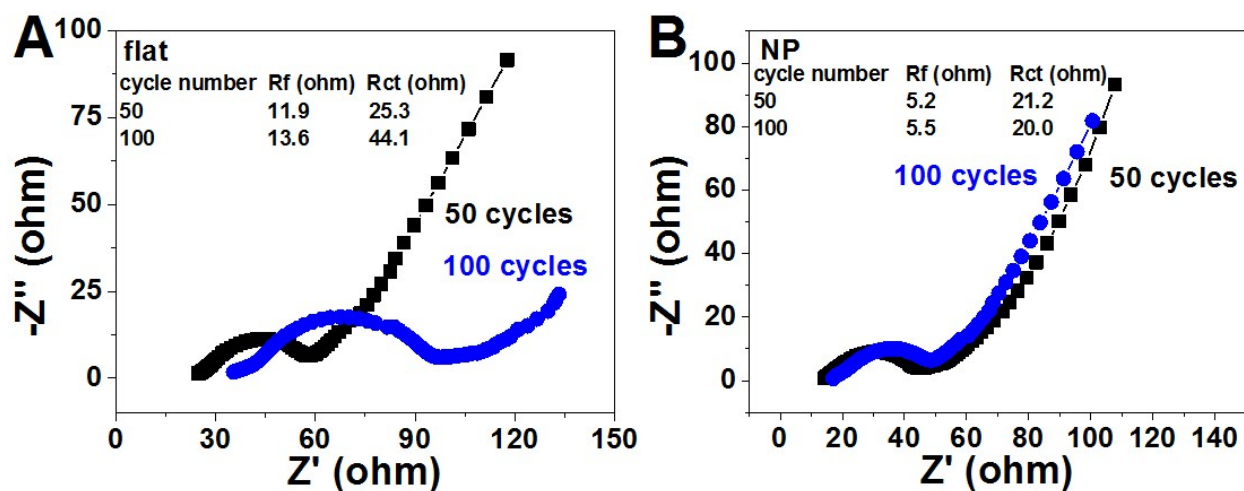

**Fig. S7.** Impedance spectra of (A) flat and (B) NP-based Cu current collectors after 50 and 100 charge-discharge cycles at 0.25 C rate with 7.0 mg graphite loading.
